# Supplementary material for: Maximizing the sustainability of a macroalgae biorefinery: a superstructure optimization of a volatile fatty acid platform
Source: Royal Society of Chemistry journal article supplement (doi:10.1039/d0gc00430h), 2020-01-01
Supplement: d0gc00430h1.pdf [file d0gc00430h1.pdf]

# **Maximizing the sustainability of a macroalgae biorefinery: a superstructure optimization of a volatile fatty acid platform**

Rofice Dickson<sup>a</sup>, Boris Brigljevic<sup>b</sup>, Hankwon Lim<sup>b</sup>, Jay Liu<sup>\*a</sup>

<sup>a</sup> Department of Chemical Engineering, Pukyong National University, Busan, 48513, Korea

<sup>b</sup> School of Energy and Chemical Engineering, Ulsan National Institute of Science and  
Technology, Ulsan, 44919, Korea

---

\* Corresponding author.

Email address: [jayliu@pknu.ac.kr](mailto:jayliu@pknu.ac.kr) (Jay Liu)

Table S.1. Nomenclature of the superstructure.

| Notation | Description                                                              | Reference |
|----------|--------------------------------------------------------------------------|-----------|
| 1,1      | Feed (SJ)                                                                | 1         |
|          | <b>Anaerobic digestion</b>                                               |           |
| 1,2      | Anaerobic digestion of SJ                                                | 2         |
|          | <b>Volatile fatty acids extraction</b>                                   |           |
| 1,3      | Extraction followed by distillation                                      | 3         |
| 2,3      | Membranes followed by extraction and distillation                        | 3,4       |
|          | <b>Mixed alcohols synthesis</b>                                          |           |
| 1,4      | Bypass                                                                   |           |
| 2,4      | Hydrogenation                                                            | 5,6       |
|          | <b>Carbon dioxide utilization</b>                                        |           |
| 1,5      | MA cultivation in open pond                                              | 7,8       |
| 2,5      | MA cultivation in photobioreactor                                        | 7,8       |
| 3,5      | Venting carbon dioxide to atmosphere                                     |           |
|          | <b>MA harvesting</b>                                                     |           |
| 1,6      | Gravity settler for MA harvesting                                        | 9         |
| 2,6      | Hollow filter membranes for MA harvesting                                | 10,11     |
| 3,6      | Diffused air flocculation for MA harvesting                              | 12–14     |
| 4,6      | Electrocoagulation for MA harvesting                                     | 15,16     |
| 5,6      | Centrifuge for MA harvesting                                             | 17        |
| 6,6      | Belt filter press for MA harvesting                                      | 18,19     |
|          | <b>Purification</b>                                                      |           |
| 1,7      | Hydrogen purification via PSA                                            | 20        |
| 2,7      | Mixed acid purification via distillation                                 | 21        |
| 3,7      | Mixed alcohol purification via pervaporation followed by distillation    | 22        |
| 4,7      | Mixed alcohol purification via molecular sieves followed by distillation | 23–25     |
| 5,7      | DDS purification                                                         | 26        |
|          | <b>Wastewater treatment</b>                                              |           |
| 1,8      | Wastewater treatment                                                     | 25,27     |
|          | <b>Products</b>                                                          |           |
| 1,9      | Hydrogen sold as a byproduct                                             | -         |
| 2,9      | Hydrogen utilized in the hydrogenation                                   | -         |
| 3,9      | Treated water recycle to process                                         | -         |
| 4,9      | Acetic acid                                                              | -         |
| 5,9      | Propionic acid                                                           | -         |
| 6,9      | Butyric acid                                                             | -         |
| 7,9      | Ethanol                                                                  | -         |
| 8,9      | Propanol                                                                 | -         |
| 9,9      | Butanol                                                                  | -         |
| 10,9     | MA                                                                       | -         |
| 11,9     | DDS                                                                      | -         |

Table S.2. Stoichiometric reactions used in anaerobic digestion.<sup>2,3</sup>

| Component             | Reaction                                                                                                                |
|-----------------------|-------------------------------------------------------------------------------------------------------------------------|
| Glucose               | $5C_6H_{12}O_6 + 4H_2O \rightarrow 6C_2H_4O_2 + 2C_3H_6O_2 + C_4H_8O_2 + 8CO_2 + 12H_2$                                 |
| Laminaran & cellulose | $5C_6H_{10}O_5 + 9H_2O \rightarrow 6C_2H_4O_2 + 2C_3H_6O_2 + C_4H_8O_2 + 8CO_2 + 12H_2$                                 |
| Mannitol              | $5C_6H_{14}O_6 + 4H_2O \rightarrow 6C_2H_4O_2 + 2C_3H_6O_2 + C_4H_8O_2 + 8CO_2 + 17H_2$                                 |
| Alginate              | $5C_6H_{12}O_6 + 12H_2O \rightarrow 6C_2H_4O_2 + 2C_3H_6O_2 + C_4H_8O_2 + 8CO_2 + 10H_2$                                |
| Fucose                | $5C_6H_{12}O_6 + 9H_2O \rightarrow 6C_2H_4O_2 + 2C_3H_6O_2 + C_4H_8O_2 + 8CO_2 + 17H_2$                                 |
| Protein               | $23C_{13}H_{25}O_7N_3S + 99H_2O + 26H_2 \rightarrow 78C_2H_4O_2 + 26C_3H_6O_2 + 13C_4H_8O_2 + 13CO_2 + 69NH_3 + 23H_2S$ |
| Lipid                 | $46C_{18}H_{34}O_2 + 238H_2O + 102H_2 + 13CO_2 \rightarrow 306C_2H_4O_2 + 02C_3H_6O_2 + 51C_4H_8O_2$                    |

Table S.3. Design parameters for microalgae cultivation and harvesting.<sup>8,16–18,28</sup>

| Process           | Algae                          | Lipid | Power                   | Heat removed | Outlet        | Separation |
|-------------------|--------------------------------|-------|-------------------------|--------------|---------------|------------|
| alternative       | productivity                   | yield | consumption             | by chillers  | concentration | efficiency |
| Open pond         | 25 g/m <sup>2</sup> /day       | 25%   | 11 kW                   | -            | -             | -          |
| PBR               | 1.25<br>kg/m <sup>3</sup> /day | 25%   | 3.9 kWh/acre            | 83.4 GJ/day  | -             | -          |
| Gravity settler   | -                              | -     | Negligible              |              | 1%            | 90%        |
| HFM               | -                              | -     | 0.04 kWh/m <sup>3</sup> |              | 13%           | 99.5%      |
| ECA               | -                              | -     | 0.7 kWh/m <sup>3</sup>  |              | 6%            | 95%        |
| DAF               | -                              | -     | 0.133 kWh/kg            |              | 6%            | 95%        |
| Centrifuges       | -                              | -     | 1.35 kWh/m <sup>3</sup> |              | 20%           | 99.7%      |
| Belt filter press | -                              | -     | 0.3 kWh/m <sup>3</sup>  |              | 20%           | 98%        |

## 1 Mathematical model

The mathematical model of the superstructure is formulated as an MINLP problem by considering the mass balance, energy balance, capital and operating cost constraints.

### 1.1 Mass balance constraints

The superstructure includes two types of splitters. The first is a fractional splitter that can take any value between 0 and 1, with several parallel pathways possible in this case. The second is a conditional splitter, which can take an integer value of either 0 or 1. These splitters must select one optimal technology from multiple alternatives. The first and second types of splitters are abbreviated as *sp/1* and *sp/2*, respectively.

The mass balance constraints of the splitters can be modeled as follows:

$$F_i^k = F_i^{in} \times \mu^k, \forall k \in K, \forall i \in I, \quad (1)$$

$$\sum_{k=1}^{n_k} \mu^k = 1, \quad (2)$$

$$F_{i,j}^{in} = \sum_{k=1}^{n_k} F_{i,j}^k, \forall i \in I, \forall j \in J, \quad (3)$$

and 
$$F_{i,j}^k \leq y_{k,j} \times UB, \forall k \in K, \forall i \in I, \forall j \in J, \quad (4)$$

where  $F_i^k$ ,  $F_i^{in}$ ,  $\mu^k$ ,  $F_{i,j}^{in}$ ,  $F_{i,j}^k$ ,  $y_{k,j}$ , and  $UB$  represent the mass flow rate of component  $i$  in the outlet stream  $k$ , mass flow rate of component  $i$  in the inlet stream, split fraction of the stream  $k$ , mass flow rate of component  $i$  in the inlet stream  $k$  from stage  $j$ , mass flow rate of component  $i$  in the

outlet stream  $k$  from stage  $j$ , binary variable used to select option  $k$  from stage  $j$ , and upper bound, respectively. The logical constraint that enforces the selection of only one technology is given by

$$\sum_{k=1}^{n_k} y_{k,j} \leq 1 \quad (5)$$

Eqs. (1) and (2) refer to  $sp/1$ , while Eqs. (3)–(5) correspond to  $sp/2$ .

The mass balance equation for reactors such as the anaerobic digester, open ponds, photobioreactors, and harvesting technologies where the reactant  $r$  is converted to the product  $p$  is given by

$$F_p^k = F_r^{in} \times \Phi_{p,r}^k + F_p^{in}, \forall k \in K, \forall p \in P, \forall r \in R, \quad (6)$$

where  $F_p^k$  is the mass flow rate of product  $p$  in the outlet stream  $k$ ,  $F_r^{in}$  is the mass flow rate of reactant  $r$  in the inlet stream,  $F_p^{in}$  is the mass flow rate of product  $p$  in the inlet stream, and  $\Phi_{p,r}^k$  is the yield of product  $p$  from reactant  $r$  in the outlet stream  $k$ .

The mass balance of component  $i$  in the outlet stream  $k$  in the pressure swing adsorption (PSA), mechanical separator, dryer, and decanter is given by

$$F_i^k = F_i^{in} \times \zeta_i^k, \forall k \in K, \forall i \in I, \quad (7)$$

and

$$\sum_{k=1}^{n_k} \zeta_i^k = 1, \forall i \in I, \quad (8)$$

where  $\zeta_i^k$  represents the recovery of component  $i$  in the outlet stream  $k$ .

The mass composition ( $X_i^k$ ) of component  $i$  in the stream  $k$  is given by

$$\sum_{k=1}^{n_k} X_i^k = \sum_{k=1}^{n_k} \frac{F_i^k}{F^k}, \forall i \in I, \quad (9)$$

where  $F^k$  is the overall mass flow rate of the stream  $k$ .

In the flash column, the mass balance of component  $i$  in the outlet stream  $k$  can be determined by

overall mass balance:

$$F_i^{in} = \sum_{k=1}^{n_k} F_i^k, \forall i \in I, \quad (10)$$

Antoine relation:

$$\log_{10} VP_i^{in} = A_a^i - \frac{A_b^i}{T^{in} + A_c^i}, \forall i \in I, \quad (11)$$

Henry relation:

$$\log VP_i^{in} = H_a^i + \frac{H_b^i}{T^{in}} + H_c^i \times \log T^{in} + H_d^i \times T^{in}, \forall i \in I, \quad (12)$$

equilibrium relation:

$$K1_i^{in} = \frac{VP_i^{in}}{P^{in}}, \forall i \in I, \quad (13)$$

bottom composition:

$$X1_i^{k1} = \left( \frac{LV + 1}{LV + K1_i^{in}} \right) \times X_i^k, \forall k1 \in K, \forall i \in I, \quad (14)$$

top composition:

$$Y1_i^{k2} = X1_i^{k1} \times K1_i^{in}, \forall i \in I, \forall k1, k2 \in K, \quad (15)$$

top overall flowrate:

$$F^{k2} = \left( \frac{F^{in}}{LV + 1} \right), \forall i \in I, \forall k2 \in K, \quad (16)$$

top component  
flowrate:

$$F_i^{k2} = F^{k2} \times Y1_i^{k2}, \forall i \in I, \forall k2 \in K, \quad (17)$$

logical constraint 1:

$$\sum_i^{n_i} X1_i^{k1} = 1, \quad (18)$$

and logical constraint  
2:

$$\sum_i^{n_i} Y1_i^{k2} = 1, \quad (19)$$

where  $VP_i^{in}$  is the vapor pressure of component  $i$  in the inlet stream,  $A_a^i$ ,  $A_b^i$ , and  $A_c^i$  are the Antoine parameters of component  $i$ ,  $H_a^i$ ,  $H_b^i$ ,  $H_c^i$ , and  $H_d^i$  are the Henry parameters of component  $i$ ,  $T^{in}$  is the inlet temperature,  $K1_i^{in}$  are the K-values of component  $i$  in the inlet stream,  $LV$  is the liquid to vapor ratio,  $X1_i^{k1}$  is the bottom composition of component  $i$  in the stream  $k1$ ,  $Y1_i^{k2}$  is the top composition of component  $i$  in the stream  $k2$ ,  $F^{k2}$  is the flowrate of the top stream, and  $F^{in}$  is the mass flowrate of the inlet stream.

In the extraction column, the mass balance of component  $i$  in the outlet stream  $k$  can be determined by

overall mass balance:

$$F_i^{in} + F_{MTBE}^{in} = \sum_{k=1}^{n_k} F_i^k, \forall i \in I, \quad (20)$$

extraction solvent:

$$F_{MTBE}^{in} = F^{in} \times \sum_{sf=1}^{sf_n} \lambda_{sf} \times b1_{sf}, \quad (21)$$

stages ( $N$ ):

$$N = \sum_{st=1}^{st_n} \sum_{sf=1}^{sf_n} v_{st} \times b2_{sf}^{st}, \quad (22)$$

extract mass balance:

$$F_i^{k1} = F_i^{in} \times \sum_{st=1}^{st_n} \sum_{sf=1}^{sf_n} \xi_{i,sf}^{st} \times b2_{sf}^{st}, \forall k1 \in K, \forall i \in I, \quad (23)$$

raffinate mass balance:

$$F_i^{k2} = F_i^{in} - F_i^{k1}, \forall k2 \in K, \forall i \in I, \quad (24)$$

logical Constraint 1:

$$\sum_{sf=1}^{sf_n} b1_{sf} = 1, \quad (25)$$

logical Constraint 2:

$$\sum_{st=1}^{st_n} \sum_{sf=1}^{sf_n} b2_{sf}^{st} = 1, \quad (26)$$

and logical Constraint 3:

$$\sum_{sf=1}^{sf_n} b1_{sf} = \sum_{st=1}^{st_n} \sum_{sf=1}^{sf_n} b2_{sf}^{st}, \quad (27)$$

where  $F_{MTBE}^{in}$  is the mass flow rate of the extraction solvent in the inlet stream,  $\lambda_{sf}$  is the parameter corresponding to the solid to feed ratio,  $b1_{sf}$  is the binary variable for selecting the optimal solid to feed ratio,  $v_{st}$  is the parameter indicating the number of stages,  $b2_{sf}^{st}$  is the binary variable for selecting the optimal number of stages,  $F_i^{k1}$  is the mass flow rate of component  $i$  in



the extract stream,  $\xi_{i, sf}^{st}$  is the split fraction of component  $i$  in the outlet stream  $k$ , and  $F_i^{k2}$  is the mass flow rate of component  $i$  in the raffinate stream.

In the stripping column, the mass balance of component  $i$  in the outlet stream  $k$  can be determined by

overall mass balance:

$$F_i^{in} + F_{LP}^{in} = \sum_{k=1}^{n_k} F_i^k, \forall i \in I, \quad (28)$$

LP-steam balance ( $F_{LP}^{in}$ ):

$$F_{LP}^{in} = \frac{F^{in} \times \varphi}{\sum_{i=1}^{n_i} K1_i^{in}}, \quad (29)$$

stages ( $N$ ):

$$\frac{\varphi - 1}{\varphi^{N+1} - 1} = 1 - \varphi, \quad (30)$$

absorption factor ( $A_i$ ):

$$A_i = \frac{F_i^{in}}{K1_i^{in} \times F_{LP}^{in}}, \forall i \in I, \quad (31)$$

stripping factor ( $S_i$ ):

$$S_i = \frac{K1_i^{in} \times F_{LP}^{in}}{F_i^{in}}, \forall i \in I, \quad (32)$$

fraction of components not absorbed ( $\gamma1_i$ ):

$$\gamma1_i = \frac{A_i - 1}{A_i^{N+1} - 1}, \forall i \in I, \quad (33)$$

fraction of

components not

stripped ( $\gamma_2$ ):

$$\gamma_2 = \frac{S_i - 1}{S_i^{N+1} - 1}, \forall i \in I, \quad (34)$$

bottom mass balance

( $F_i^{k1}$ ):

$$F_i^{k1} = F_i^{in} \times \gamma_2 + F_{LP}^{in} \times (1 - \gamma_1), \forall k1 \in K, \forall i \in I, \quad (35)$$

and top mass balance

( $F_i^{k2}$ ):

$$F_i^{k2} = F_i^{in} - F_i^{k1}, \forall k2 \in K, \forall i \in I, \quad (36)$$

where  $\varphi$  is the stripping factor and  $\omega$  is the recovery of the key component.

In the distillation model, it is assumed that all components heavier than the heavy key component would accumulate in the bottom stream. Similarly, all components lighter than the light key component will accumulate in the distillate. The mass balance equations of the light key ( $lk$ ) and heavy key ( $hk$ ) components in the distillate ( $d$ ) and bottom ( $b$ ) stream can be modeled as

$$F_{lk}^d \geq F_{lk}^{in} \times \omega_{lk}^D, \forall d \in K, \forall lk \in I, \quad (37)$$

$$F_{lk}^b \leq F_{lk}^{in} \times (1 - \omega_{lk}^D), \forall b \in K, \forall lk \in I, \quad (38)$$

$$F_{hk}^d \leq F_{hk}^{in} \times \omega_{hk}^D, \forall d \in K, \forall hk \in I, \quad (39)$$

$$F_{hk}^b \geq F_{hk}^{in} \times (1 - \omega_{hk}^D), \forall b \in K, \forall hk \in I, \quad (40)$$

where  $\omega_{lk}^D$  and  $\omega_{hk}^D$  are the split fractions of the light key and heavy key components in the distillate, which can be estimated by modeling the rigorous distillation column (Radfrac) in the Aspen Plus<sup>®</sup> V10 software.

The mass balance constraint for the mixers, pumps, compressors, and heat exchangers is

$$F_i^{out} = \sum_{k=1}^{n_k} F_i^k, \forall i \in I \quad (41)$$

where  $F_i^k$  is the mass flowrate of component  $i$  in the inlet steam  $k$ .

The amount of solids at any stage  $j$  is controlled by

$$F_{i,j}^k \leq \alpha_{i,j}^k \times F_j^k, \forall k \in K, \forall i \in I, \forall j \in J, \quad (42)$$

and

$$F_j^k = \sum_{i=1}^{n_i} F_{i,j}^k, \forall k \in K, \forall j \in J \quad (43)$$

where  $F_{i,j}^k$  is the mass flowrate of component  $i$  in the stream  $k$  of stage  $j$ ,  $F_j^k$  is the total mass flowrate in stream  $k$  of stage  $j$ , and  $\alpha_{i,j}^k$  is the mass fraction of component  $i$  in the stream  $k$  of stage  $j$ .

The feedstock purchase is bounded by its availability ( $\Theta$ ) and minimum purchase amount ( $\gamma$ ):

$$\Theta \geq Feed \geq \gamma. \quad (44)$$

## 1.2 Energy balance constraints

The following energy balance constraint was used for each unit operation:

$$\sum_{i=1}^{n_i} F_i^{in} \times cp_i^{in} \times T^{in} + Q_{GEN} + Q_{EXT} = \sum_{i=1}^{n_i} F_i^{out} \times cp_i^{out} \times T^{out} \quad (45)$$

where  $cp_i^{in}$  and  $cp_i^{out}$  are the specific heat values of component  $i$  corresponding to the inlet and outlet conditions, respectively,  $T^{in}$  and  $T^{out}$  are the temperatures with respect to the inlet and outlet conditions, respectively,  $F_i^{in}$  and  $F_i^{out}$  are the flows corresponding to the inlet and outlet conditions, respectively, and  $Q_{GEN}$  and  $Q_{EXT}$  are the heat power values generated during the process and external heat duty, respectively.

Heat balance in the reboiler and condenser is determined by a simple relation and can be rearranged as

$$Q_{EXT} = (1 + R) \sum_{i=1}^{n_i} f_{b,i} \lambda_i \quad (46)$$

and

$$Q_{EXT} = - (1 + R) \sum_{i=1}^{n_i} f_{d,i} \lambda_i \quad (47)$$

where  $f_{d,i}$ ,  $f_{b,i}$ ,  $R$ , and  $\lambda_i$  are the component molar flowrate in the distillate, component molar flowrate at the bottom, reflux ratio, and latent heat of the component  $i$ , respectively.

The temperature and pressure of the outlet stream of the flash, distillation, and stripping columns and membranes can be determined using Eqs. (11) and (12), and the bubble point and dew point equations.

The power (kW) required for the pumps and compressors can be determined by

$$Power = \frac{\sum_{i=1}^{n_i} \rho_i \times (P^{out} - P^{in})}{\eta_{pump}}, \quad (48)$$

$$\text{and } Power = \sum_{k=1}^{n_k} \sum_{i=1}^{n_i} \frac{F_i^k}{MW_i^k} \times T^k \times r \times \left( \frac{\gamma}{\gamma - 1} \right) \times PR^{\left( \frac{\gamma}{\gamma - 1} - 1 \right)} \times \frac{1}{\eta_{comp}} \times n_{comp} \quad (49)$$

where  $\rho_i$  is the volumetric density of component  $i$ ,  $P^{out}$  is the outlet pressure,  $P^{in}$  is the inlet pressure,  $\eta_{pump}$  is the pump efficiency,  $MW_i^k$  is the molecular weight of component  $i$  in the stream  $k$ ,  $r$  is the general gas constant,  $\gamma$  is the heat capacity ratio,  $\eta_{comp}$  is the compressor efficiency,  $n_{comp}$  is the number of stages in the compressor, and  $PR$  is the pressure ratio.  $PR$  can be determined by

$$(PR)^{n_{comp}} = \frac{P^{out}}{P^{in}}. \quad (50)$$

The inter-stage cooling load (kW) between the stages of a multi-stage compressor can be determined using Eq. (45)

### 1.3 Economic analysis constraints

A techno-economic model was formulated to conduct multiperiod economic analysis, which includes constraints for estimating the total capital investment (TCI) and total cost of manufacturing (TCOM).

### 1.3.1 Total capital investment

The TCI consists of the total direct costs (TDC), total indirect costs (TIDC), working capital costs, and land costs. The TDC includes the costs related to the equipment, site development, and warehouse, along with additional expenses for the piping and instrumentation. Similarly, the TIDC includes the portable and field expenses, project contingency costs, and home and office construction costs. The equipment cost was determined using the relevant economic data from literature, which are summarized in Table S.1.

Table S.4. Data for calculating the capital cost.<sup>3,8,18,25,29,30</sup>

| Equipments                   | Baseline Purchased<br>Cost USD | Year<br>of<br>quote | Scaling<br>Exponents | Installation<br>factor |
|------------------------------|--------------------------------|---------------------|----------------------|------------------------|
| Pump                         | 22,500                         | 2009                | 0.8                  | 2.3                    |
| Heater                       | 92,000                         | 2010                | 0.7                  | 2.2                    |
| Digester                     | 2,700,000                      | 2010                | 0.6                  | 1                      |
| Cooler                       | 85,000                         | 2010                | 0.7                  | 2.2                    |
| Flash tank                   | 511,000                        | 2009                | 0.7                  | 2                      |
| Compressor                   | 870,000                        | 2009                | 0.68                 | 1.6                    |
| Pressure swing<br>adsorption | 4,855,471                      | 2002                | 0.6                  | 2.47                   |
| Mechanical separator         | 3,294,700                      | 2009                | 0.8                  | 1.7                    |
| Dryer                        | 10,500,000                     | 1990                | 0.6                  | 1                      |
| Condenser                    | 34,000                         | 2009                | 0.7                  | 2.2                    |
| Membrane                     | 1,000                          | 2010                | -                    | -                      |
| Heat exchanger               | 85,000                         | 2010                | 0.7                  | 2.2                    |
| Extraction column            | 1,210,000                      | 2012                | -                    | 5                      |
| Stripping column             | 114,000                        | 2018                | 0.6                  | 3                      |
| Decanter                     | 569,000                        | 2015                | 0.6                  | 2                      |
| Hydrogenation                | 2,026,515                      | 2002                | 0.56                 | 2.47                   |

|                                                     |             |      |      |      |
|-----------------------------------------------------|-------------|------|------|------|
| reactor                                             |             |      |      |      |
| Molecular sieves                                    | 901,362     | 1998 | 0.7  | 2.47 |
| Distillation column                                 | 3,300,000   | 2018 | 0.6  | 1    |
| Open ponds                                          | 158,506,910 | 2011 | 1    | 1    |
| Photobioreactors                                    | 109,000     | 2011 | 1    | 1    |
| Inoculum system                                     | 18.22/m2    | 2011 | 1    | 1    |
| Covered pond                                        | 233,000     | 2011 | 1    | 1    |
| Open lined pond                                     | 87,000      | 2011 | 1    | 1    |
| Lining for covered inoculum pond                    | 3,097,827   | 2014 | 1    | 1    |
| Air supported greenhouse for covered inoculum ponds | 3/ft2       | 2014 | 1    | 1    |
| Lining for open inoculum pond                       | 3,097,827   | 2014 | 1    | 1    |
| CO <sub>2</sub> piping                              | 1,400,800   | 2014 | 0.6  | 1.25 |
| Storage tank immersion                              | 70,500      | 2014 | 1    | 1.76 |
| Trunk line                                          | 1,661,900   | 2014 | 1    | 1.76 |
| Branch line                                         | 912,300     | 2014 | 1    | 1.76 |
| Within plot piping                                  | 2,210,000   | 2014 | 1    | 1    |
| Makeup delivery section                             | 5,421,935   | 2014 | 1    | 1.37 |
| Primary settler                                     | 1,715,000   | 2014 | 1    | 1    |
| Hollow filter membranes                             | 12,864,000  | 2014 | 0.75 | 1    |
| Centrifuge for dewatering microalgae                | 560,000     | 2013 | 1    | 1    |

The power law was used to estimate the capacity-adjusted capital cost  $C_n$  as follows:

$$C_n = (I_n)(C_{n,o})\left(\frac{Q_n}{Q_{n,o}}\right)^{a_n}, \forall n \in N, \quad (51)$$

where  $I_n$  is the installation factor,  $C_{n,o}$  is the cost of the baseline equipment  $n$ ,  $Q_n$  and  $Q_{n,o}$  are the adjusted and baseline capacities of equipment  $n$ , and  $a_n$  is a scaling exponent, which varies depending on the type of equipment  $n$ . Once the capacity-adjusted equipment cost has been determined, the capital cost of the equipment is then updated to the year of analysis using the chemical engineering plant cost index (CEPCI):

$$UC_n = C_n \left( \frac{CEPCI_{2019}}{CEPCI_{ref}} \right), \forall n \in N, \quad (52)$$

where  $UC_n$  is the updated equipment cost in the year of interest, and  $CEPCI_{2019}$  and  $CEPCI_{ref}$  are the index values corresponding to the year 2019 and baseline year, respectively.

The factor approach is used to calculate the TDC and TIDC after the equipment cost has been determined in the year of interest. Tables S.2. and S.3. present the cost factors used to estimate the direct and indirect costs of the volatile fatty acid (VFA) and microalgae sections, respectively.

Table S.5. Cost factors used to estimate the direct and indirect costs of the VFA section.<sup>3,25</sup>

| Direct cost       | % of installed costs    |
|-------------------|-------------------------|
| Installed costs   | 100%                    |
| Warehouse         | 4%                      |
| Site development  | 9%                      |
| Additional piping | 4.5%                    |
| Indirect costs    | % of total direct costs |



|                              |     |
|------------------------------|-----|
| Portable costs               | 10% |
| Field expenses               | 10% |
| Home office and construction | 20% |
| Project contingency          | 10% |
| Other costs                  | 10% |

Table S.6. Cost factors used to estimate the direct and indirect costs of the microalgae section.<sup>8</sup>

| <b>Direct cost</b>              | <b>% of dewatering<br/>installed cost</b> | <b>% of cultivation<br/>installed cost<sup>a</sup></b> | <b>% of OSBL<br/>installed cost<sup>b</sup></b> |
|---------------------------------|-------------------------------------------|--------------------------------------------------------|-------------------------------------------------|
| Warehouse                       | 4%                                        | 1.2%                                                   | -                                               |
| Site development                | 9%                                        | -                                                      | \$1,534/acre                                    |
| Additional piping               | 4.5%                                      | -                                                      | -                                               |
| <b>Indirect costs</b>           | <b>% of dewatering<br/>TDC</b>            | <b>% of cultivation and<br/>inoculum pond TDC</b>      | <b>% of OSBL TDC</b>                            |
| Portable costs                  | 10%                                       | 4%                                                     | 1%                                              |
| Field expenses                  | 10%                                       | 4.5%                                                   | 1%                                              |
| Home office and<br>construction | 20%                                       | 10.3%                                                  | 1%                                              |
| Project contingency             | 10%                                       | 10%                                                    | 10%                                             |
| Other costs                     | 10%                                       | 2.6%                                                   | 1%                                              |

<sup>a</sup>cultivation includes open ponds or photobioreactors and the inoculum system installed cost

<sup>b</sup>Outside battery limit (OSBL) includes the CO<sub>2</sub> delivery installed cost

After all the TDC and TIDC sections have been estimated, the above-mentioned costs are then summed to yield the fixed capital investment (FCI). The working capital, at 5% of the total installed cost, and land costs are subsequently added to obtain the TCI.

### 1.3.2 Total cost of manufacturing

The TCOM consists of the total direct manufacturing cost (TDMC), total fixed manufacturing cost (TFMC), and general manufacturing cost (GMC). The TDMC includes the costs of the raw materials

( $C_{RM}$ ), utilities ( $C_{UT}$ ), operating labor ( $C_{OL}$ ), waste treatment ( $C_{WT}$ ), maintenance and repairs, and patents and royalties. Fixed manufacturing costs include depreciation, local taxes, insurance, and plant overhead. General costs are related to the administration, distribution, and selling expenses in addition to the research and development costs. The cost of the raw materials and utilities can be estimated using the mass and energy balance constraints detailed in Sections 1.1 and 1.2. The cost of operating labor is determined by estimating the labor require for the plant ( $N_{OL}$ ) based on the following constraints <sup>29</sup>:

$$N_{OL} = C_0 + C_1 N_{np}, \quad (53)$$

and

$$N_{np} = \sum Equipment, \quad (54)$$

where  $C_0$  and  $C_1$  are constants and  $N_{np}$  represents the number of nonparticulate processing steps including compression, heating, cooling, mixing, and reaction. The updated wages for the operating labor were retrieved from the U.S. Bureau of Labor and Statistics and subsequently multiplied by  $N_{OL}$  to determine  $C_{OL}$  <sup>31</sup>. A  $C_{WT}$  of \$2.5 per 1000 gal was applied.  $T_{COM}$  can be estimated as follows:

$$T_{COM} = f_1 C_{OL} + f_2 F_{CI} + f_3 (C_{UT} + C_{RM} + C_{WT}), \quad (55)$$

where  $f_1$ ,  $f_2$ , and  $f_3$  are multipliers, and  $F_{CI}$  is the fixed capital investment.

The total process revenues ( $Rev$ ) from the sale of mixed acids, mixed alcohols, microalgae, hydrogen, and DDS are given by

$$Rev = \sum_{p=1}^{n_p} f_p P_p, \quad (56)$$

where  $n_p$  is the number of products,  $f_p$  is the mass flow rate of product  $p$ , and  $P_p$  is the wholesale price of product  $p$ .

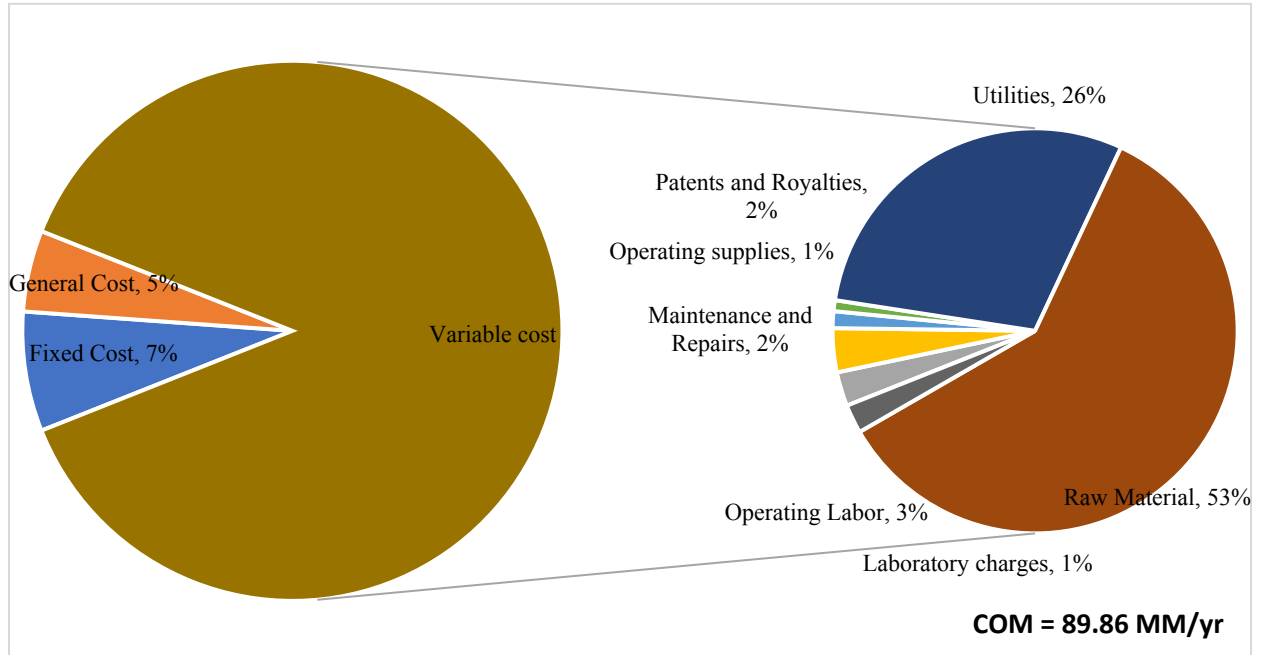

Fig. S.1. Breakdown of the manufacturing costs of the VFA section.

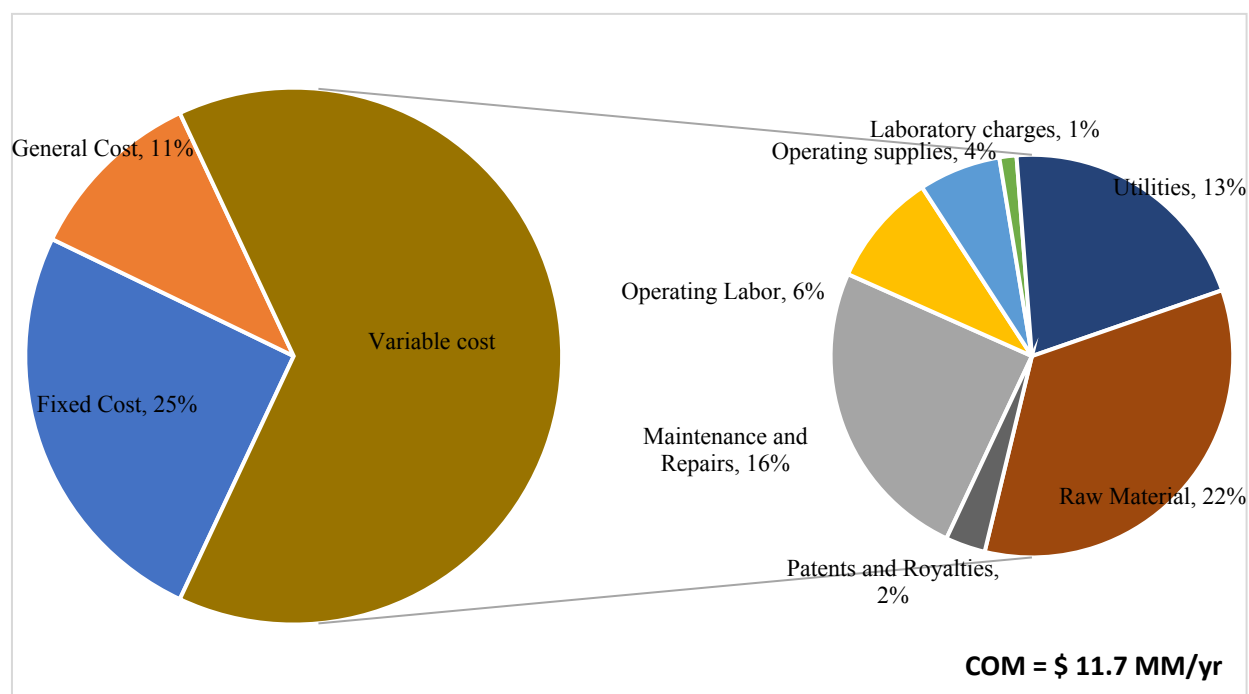

Fig. S.2. Breakdown of the manufacturing costs of the microalgae section.

## 2 References

- 1 T. Bruton, H. Lyons, Y. Lerat, M. Stanley and M. B. Rasmussen, *A Review of the Potential of Marine Algae as a Source of Biofuel in Ireland*, 2009.
- 2 T. N. Pham, W. J. Nam, Y. J. Jeon and H. H. Yoon, *Bioresour. Technol.*, 2012, **124**, 500–503.
- 3 P. Fasahati and J. J. Liu, *Chem. Eng. Res. Des.*, 2015, **98**, 107–122.
- 4 K. Sato, K. Sugimoto, T. Kyotani, N. Shimotsuma and T. Kurata, *J. Memb. Sci.*, 2011, **385**, 20–29.
- 5 L. Schuster, F. J. Mueller, A. Anderlohr, P. Blei, G. Eigenberger, B. Hoppner, G. Kaibel and W. Steiner, U.S. Patent 4,517,391, 1985.
- 6 Y. Zhu and S. Jones, *Techno-economic Analysis for the Thermochemical Conversion of Lignocellulosic Biomass to Ethanol via Acetic Acid Synthesis*, 2009.
- 7 R. Davis, A. Aden and P. T. Pienkos, *Appl. Energy*, 2011, **88**, 3524–3531.
- 8 R. Davis, J. Markham, C. Kinchin, N. Grundl, E. C. D. Tan and D. Humbird, *Process Design and Economics for the Production of Algal Biomass: Algal Biomass Production in Open Pond Systems and Processing Through Dewatering for Downstream Conversion*, 2016.
- 9 T. J. Lundquist, I. C. Woertz, N. W. T. Quinn and J. R. Benemann, *A Realistic Technology*

*and Engineering Assessment of Algae Biofuel Production*, 2010.

- 10 M. R. Bilad, H. A. Arafat and I. F. J. Vankelecom, *Biotechnol. Adv.*, 2014, **32**, 1283–1300.
- 11 R. Bhawe, T. Kuritz, L. Powell and D. Adcock, *Environ. Sci. Technol.*, 2012, **46**, 5599–5606.
- 12 M. Heasman, J. Diemar, W. O'Connor, T. Sushames and L. Foulkes, *Aquac. Res.*, 2000, **31**, 637–659.
- 13 G. Chen, L. Zhao, Y. Qi and Y. L. Cui, *J. Nanomater.*, 2014, **2014**, 9.
- 14 A. Schlesinger, D. Eisenstadt, A. Bar-Gil, H. Carmely, S. Einbinder and J. Gressel, *Biotechnol. Adv.*, 2012, **30**, 1023–1030.
- 15 M. P. Mchenry, *Biomass and Biofuels from Microalgae*, Springer Berlin Heidelberg, 2015, vol. 2.
- 16 D. Vandamme, S. C. V. Pontes, K. Goiris, I. Foubert, L. J. J. Pinoy and K. Muylaert, *Biotechnol. Bioeng.*, 2011, **108**, 2320–2329.
- 17 A. J. Dassey and C. S. Theegala, *Bioresour. Technol.*, 2013, **128**, 241–245.
- 18 C. M. Beal, L. N. Gerber, D. L. Sills, M. E. Huntley, S. C. Machesky, M. J. Walsh, J. W. Tester, I. Archibald, J. Granados and C. H. Greene, *Algal Res.*, 2015, **10**, 266–279.
- 19 M. E. Huntley, Z. I. Johnson, S. L. Brown, D. L. Sills, L. Gerber, I. Archibald, S. C. Machesky, J. Granados, C. Beal and C. H. Greene, *Algal Res.*, 2015, **10**, 249–265.
- 20 P. Spath, A. Aden, T. Eggeman, M. Ringer, B. Wallace and J. Jechura, *Biomass to Hydrogen Production Detailed Design and Economics Utilizing the Battelle Columbus Heated*

*Gasifier Biomass to Hydrogen Production Detailed Design and Economics Utilizing the Battelle Columbus*, 2005.

- 21 A. Bono, O. P. Pin and C. P. Jiun, *J. Appl. Sci.*, 2010, **10**, 2508–2515.
- 22 P. Fasahati and J. J. Liu, *Energy*, 2015, **93**, 2321–2336.
- 23 S. Phillips, A. Aden, J. Jechura and D. Dayton, *Thermochemical Ethanol via Indirect Gasification and Mixed Alcohol Synthesis of Lignocellulosic Biomass Thermochemical Ethanol via Indirect Gasification and Mixed Alcohol Synthesis of Lignocellulosic Biomass*, 2007.
- 24 S. D. Phillips, *Technoeconomic Analysis of a Lignocellulosic Biomass Indirect Gasification Process To Make Ethanol via Mixed Alcohols Synthesis*, 2012.
- 25 D. Humbird, R. E. Davis, L. Tao, C. M. Kinchin, D. D. Hsu, A. Aden, P. Schoen, J. Lukas, B. Olthof, M. Worley, D. Sexton and D. Dudgeon, *Process Design and Economics for Biochemical Conversion of Lignocellulosic Biomass to Ethanol*, 2011.
- 26 L. Karuppiyah, R., Peschel, A., Grossmann, I. E., Martín, M., Martinson, W., & Zullo, *AIChE J.*, 2008, **54**, 1499–1525.
- 27 E. Ahmetović, M. Martín and I. E. Grossmann, *Ind. Eng. Chem. Res.*, 2010, **49**, 1–37.
- 28 A. K. Ringsmuth, M. J. Landsberg and B. Hankamer, *Renew. Sustain. Energy Rev.*, 2016, **62**, 134–163.
- 29 J. A. S. Richard Turton, Richard C. Bailie, Wallace B. Whiting, *Analysis, Synthesis and Design of Chemical Processes Third Edition*, Prentice Hall, 3rd edn., 2013.

- 30 W. A. Amos, *Report on Biomass Drying Technology Report on Biomass Drying Technology*, 1998.
- 31 Department of Labor's Bureau of Labor Statistics, <https://www.bls.gov/>.
